# Supplementary material for: Setdb1 Is Required for Myogenic Differentiation of C2C12 Myoblast Cells via Maintenance of MyoD Expression
Source: PubMed Central journal article supplement — Mol Cells. 2015 Feb 25;38(4):362–72. doi: 10.14348/molcells.2015.2291 (PMC4400312; doi:10.14348/molcells.2015.2291), 2015-02-25
Supplement: molce-38-4-362-supple.pdf [file molce-38-4-362-supple.pdf]

**Fig. S1.**

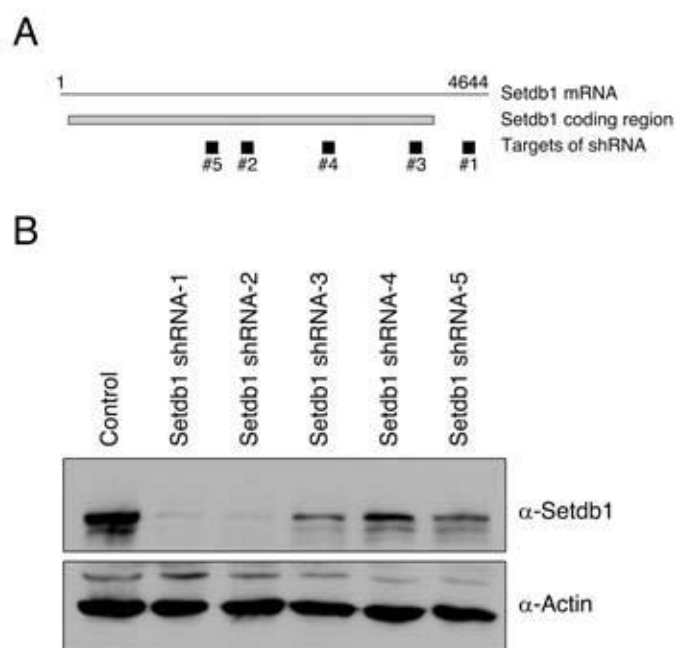

**Fig. S1.**

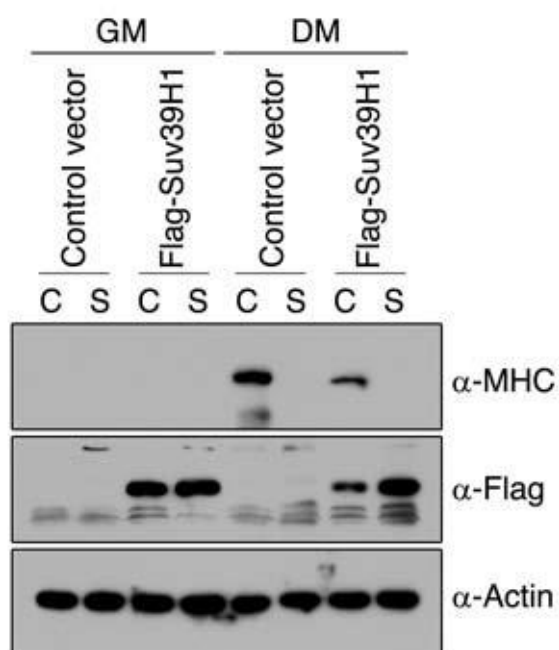

**Fig. S3.**

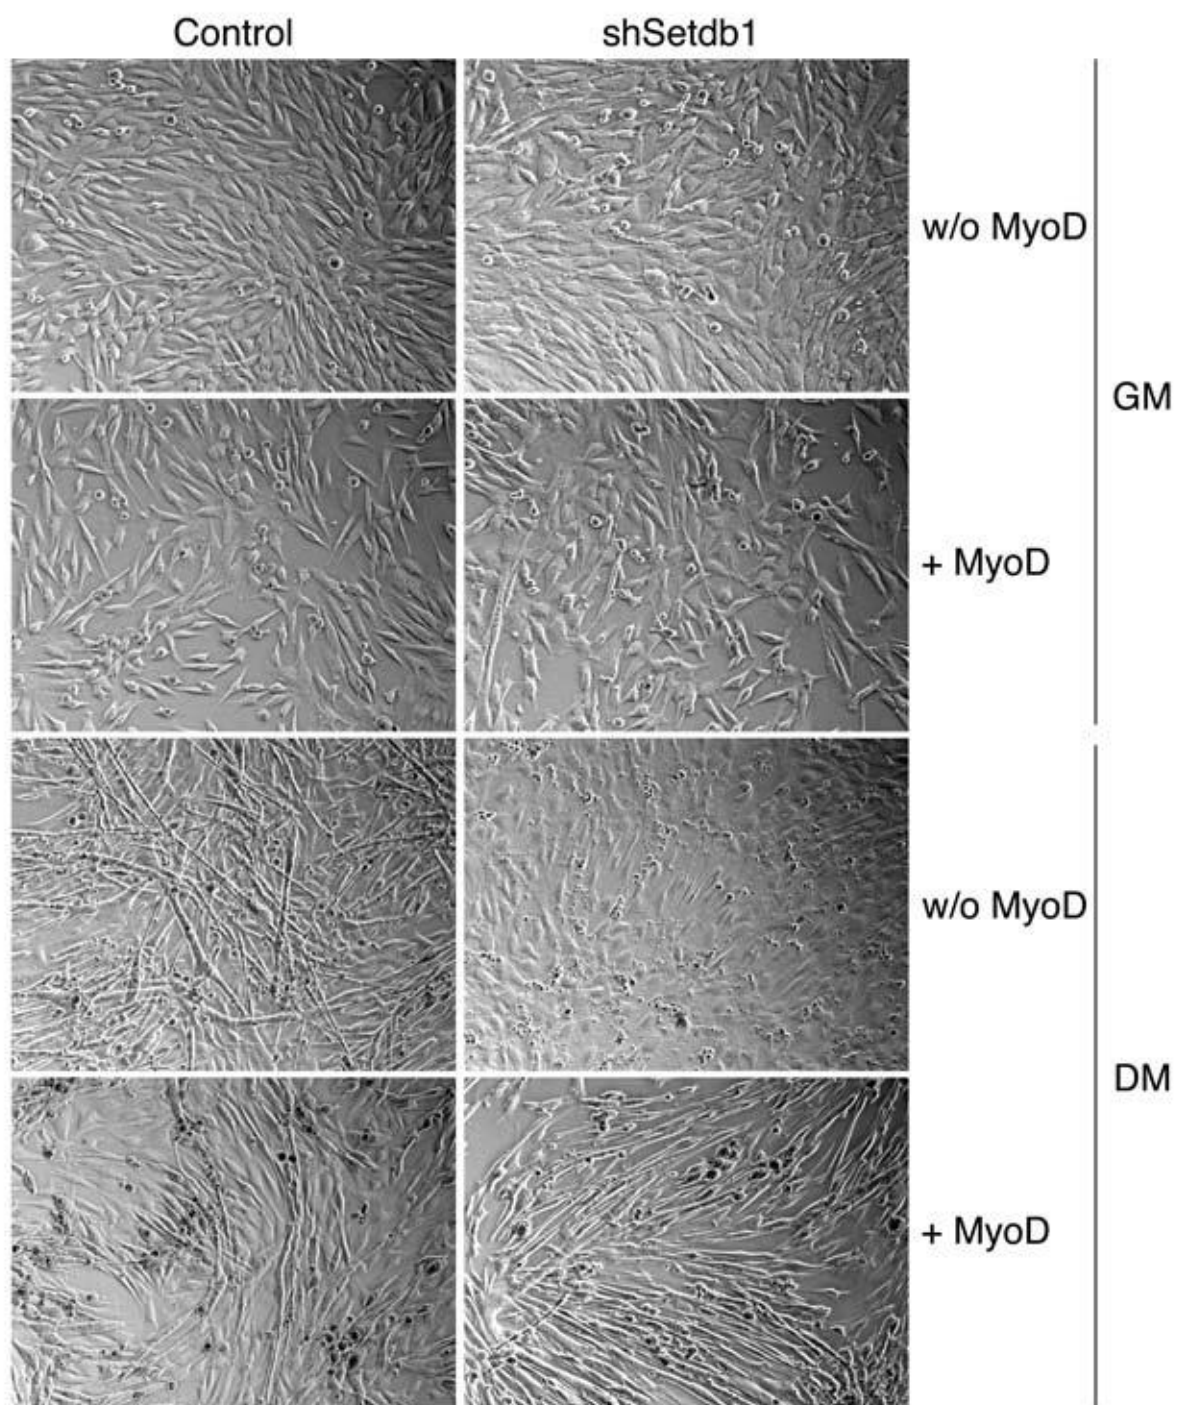

**Table S1. Genes deregulated by Setdb1-depletion in C2C12 myoblast cells**

| <b>Genes</b>        | <b>Fold change (Microarray)</b> | <b>Fold change (NGS)</b> |
|---------------------|---------------------------------|--------------------------|
| <b>Adhesion</b>     |                                 |                          |
| Nid2                | -5.19                           | -3.82                    |
| Emb                 | -3.64                           | -4.40                    |
| Msln                | 3.04                            | 12.06                    |
| <b>Biological</b>   |                                 |                          |
| Pdgfr1              | -6.26                           | -8.49                    |
| Kctd15              | -5.10                           | -5.91                    |
| Sgca                | -3.22                           | -3.04                    |
| Kbtbd5              | -3.15                           | -3.09                    |
| Sertad4             | -2.36                           | -2.57                    |
| Lix1                | -2.27                           | -3.97                    |
| Gprc5a              | 2.22                            | 2.77                     |
| Gm773               | 2.84                            | 2.22                     |
| Pr12c3              | 15.00                           | 8.06                     |
| <b>Cell death</b>   |                                 |                          |
| Peg3                | -7.55                           | -4.83                    |
| G0s2                | -6.31                           | -9.55                    |
| Pcsk9               | -5.94                           | -4.99                    |
| Mmp2                | -3.06                           | -2.17                    |
| Dapk2               | -3.06                           | -3.80                    |
| Tgfb3               | -2.53                           | -5.20                    |
| Aim2                | 2.35                            | 4.76                     |
| Casp4               | 2.37                            | 2.39                     |
| Aqp1                | 2.71                            | 2.04                     |
| Xdh                 | 2.94                            | 3.26                     |
| Slc9a3r1            | 2.97                            | 4.02                     |
| Amigo2              | 3.55                            | 3.23                     |
| <b>Cell cycle</b>   |                                 |                          |
| Igf2                | -33.29                          | -39.05                   |
| Gspt2               | 2.63                            | 2.25                     |
| <b>Cytoskeletal</b> |                                 |                          |
| Pdlim3              | -8.01                           | -2.99                    |
| Ptn                 | -4.55                           | -13.51                   |
| Sobp                | -3.90                           | -2.72                    |
| Tppp3               | -3.44                           | -2.21                    |
| Fmnl2               | -3.37                           | -4.56                    |
| Lrrc17              | -2.14                           | -4.43                    |
| Sgcb                | -2.12                           | -2.08                    |
| <b>Localization</b> |                                 |                          |
| Chrng               | -21.69                          | -7.78                    |
| Mb                  | -10.30                          | -13.88                   |
| Ttyh3               | -2.98                           | -2.84                    |
| Gga2                | -2.80                           | -4.71                    |
| Bscl2               | -2.54                           | -3.31                    |
| Mest                | -2.19                           | -18.59                   |
| Spire2              | 2.79                            | 2.23                     |

**Metabolism**

|               |        |        |
|---------------|--------|--------|
| C1qtnf3       | -25.98 | -11.10 |
| Igfbp4        | -8.44  | -5.59  |
| Ckb           | -5.41  | -9.28  |
| Ebf3          | -2.79  | -2.21  |
| Col1a1        | -2.74  | -3.32  |
| Adamts12      | -2.70  | -2.70  |
| Dkk3          | -2.56  | -3.43  |
| Pknox2        | -2.42  | -2.49  |
| Mmp15         | -2.36  | -2.50  |
| Tlr2          | -2.27  | -2.54  |
| Zfp36l1       | -2.26  | -2.12  |
| Gamt          | -2.07  | -3.16  |
| Gchfr         | 2.22   | 2.30   |
| Areg          | 2.72   | 3.93   |
| Klf2          | 2.75   | 4.16   |
| Rapgef3       | 2.93   | 2.43   |
| Atg9b         | 3.00   | 2.90   |
| Acsbg1        | 3.38   | 28.12  |
| Sgsm1         | 3.58   | 2.58   |
| 4930486L24Rik | 3.73   | 3.26   |
| 5730469M10Rik | 3.86   | 4.53   |
| Akr1c12       | 4.26   | 4.37   |
| Dppa4         | 10.57  | 2.59   |

**Muscle**

|        |         |        |
|--------|---------|--------|
| Mylpf  | -111.79 | -96.85 |
| Tnnt1  | -90.57  | -11.47 |
| Myl1   | -81.06  | -3.33  |
| Actc1  | -71.28  | -45.60 |
| Tnnc2  | -69.35  | -26.55 |
| Atp2a1 | -27.53  | -12.33 |
| Tnnc1  | -24.75  | -37.74 |
| Igfbp5 | -23.59  | -8.54  |
| Ogn    | -18.16  | -11.81 |
| Tpm2   | -15.33  | -2.64  |
| Myog   | -13.14  | -35.92 |
| Acta1  | -10.34  | -9.06  |
| Tnnt3  | -8.93   | -11.32 |
| Myod1  | -5.96   | -8.40  |
| Pgam2  | -5.60   | -2.60  |
| Actn3  | -5.26   | -3.85  |
| Myom2  | -5.01   | -4.21  |
| Hey1   | -3.67   | -3.64  |
| Lrp4   | -3.59   | -6.53  |
| Sulf2  | -2.88   | -2.19  |
| Ncam1  | -2.82   | -17.57 |
| Nfatc4 | -2.56   | -3.11  |
| Pparg  | 3.23    | 2.52   |

**Signaling**

|        |       |       |
|--------|-------|-------|
| Itga11 | -6.00 | -4.26 |
| Cthrc1 | -3.35 | -5.73 |
| Ephb2  | -2.99 | -3.35 |

|        |       |       |
|--------|-------|-------|
| Gprc5b | -2.09 | -2.67 |
| Rcan2  | 2.91  | 5.25  |
| Apccd1 | 3.08  | 2.57  |

**Unannotated**

|               |       |        |
|---------------|-------|--------|
| Islr          | -8.28 | -9.23  |
| Lrrn1         | -6.42 | -8.08  |
| Rtn2          | -5.64 | -4.17  |
| Drp2          | -4.41 | -2.31  |
| Cd200         | -3.41 | -12.55 |
| Actg2         | -3.16 | -6.64  |
| Srl           | -3.06 | -3.97  |
| 1810014F10Rik | -2.76 | -4.16  |
| Cd82          | -2.63 | -2.16  |
| Tspan7        | 3.30  | 7.79   |
| Havcr2        | 4.58  | 5.95   |
| Cd69          | 4.73  | 2.58   |
| Ly6c1         | 5.58  | 5.81   |
| Ly6a          | 6.21  | 47.23  |

---

**Table S1. Genes deregulated by Setdb1-depletion in C2C12 myoblast cells**

| <b>Genes</b>        | <b>Fold change (Microarray)</b> | <b>Fold change (NGS)</b> |
|---------------------|---------------------------------|--------------------------|
| <b>Adhesion</b>     |                                 |                          |
| Nid2                | -5.19                           | -3.82                    |
| Emb                 | -3.64                           | -4.40                    |
| Msln                | 3.04                            | 12.06                    |
| <b>Biological</b>   |                                 |                          |
| Pdgfr1              | -6.26                           | -8.49                    |
| Kctd15              | -5.10                           | -5.91                    |
| Sgca                | -3.22                           | -3.04                    |
| Kbtbd5              | -3.15                           | -3.09                    |
| Sertad4             | -2.36                           | -2.57                    |
| Lix1                | -2.27                           | -3.97                    |
| Gprc5a              | 2.22                            | 2.77                     |
| Gm773               | 2.84                            | 2.22                     |
| Pr12c3              | 15.00                           | 8.06                     |
| <b>Cell death</b>   |                                 |                          |
| Peg3                | -7.55                           | -4.83                    |
| G0s2                | -6.31                           | -9.55                    |
| Pcsk9               | -5.94                           | -4.99                    |
| Mmp2                | -3.06                           | -2.17                    |
| Dapk2               | -3.06                           | -3.80                    |
| Tgfb3               | -2.53                           | -5.20                    |
| Aim2                | 2.35                            | 4.76                     |
| Casp4               | 2.37                            | 2.39                     |
| Aqp1                | 2.71                            | 2.04                     |
| Xdh                 | 2.94                            | 3.26                     |
| Slc9a3r1            | 2.97                            | 4.02                     |
| Amigo2              | 3.55                            | 3.23                     |
| <b>Cell cycle</b>   |                                 |                          |
| Igf2                | -33.29                          | -39.05                   |
| Gspt2               | 2.63                            | 2.25                     |
| <b>Cytoskeletal</b> |                                 |                          |
| Pdlim3              | -8.01                           | -2.99                    |
| Ptn                 | -4.55                           | -13.51                   |
| Sobp                | -3.90                           | -2.72                    |
| Tppp3               | -3.44                           | -2.21                    |
| Fmnl2               | -3.37                           | -4.56                    |
| Lrrc17              | -2.14                           | -4.43                    |
| Sgcb                | -2.12                           | -2.08                    |
| <b>Localization</b> |                                 |                          |
| Chrng               | -21.69                          | -7.78                    |
| Mb                  | -10.30                          | -13.88                   |
| Ttyh3               | -2.98                           | -2.84                    |
| Gga2                | -2.80                           | -4.71                    |
| Bscl2               | -2.54                           | -3.31                    |
| Mest                | -2.19                           | -18.59                   |
| Spire2              | 2.79                            | 2.23                     |

**Metabolism**

|               |        |        |
|---------------|--------|--------|
| C1qtnf3       | -25.98 | -11.10 |
| Igfbp4        | -8.44  | -5.59  |
| Ckb           | -5.41  | -9.28  |
| Ebf3          | -2.79  | -2.21  |
| Col1a1        | -2.74  | -3.32  |
| Adamts12      | -2.70  | -2.70  |
| Dkk3          | -2.56  | -3.43  |
| Pknox2        | -2.42  | -2.49  |
| Mmp15         | -2.36  | -2.50  |
| Tlr2          | -2.27  | -2.54  |
| Zfp36l1       | -2.26  | -2.12  |
| Gamt          | -2.07  | -3.16  |
| Gchfr         | 2.22   | 2.30   |
| Areg          | 2.72   | 3.93   |
| Klf2          | 2.75   | 4.16   |
| Rapgef3       | 2.93   | 2.43   |
| Atg9b         | 3.00   | 2.90   |
| Acsbg1        | 3.38   | 28.12  |
| Sgsm1         | 3.58   | 2.58   |
| 4930486L24Rik | 3.73   | 3.26   |
| 5730469M10Rik | 3.86   | 4.53   |
| Akr1c12       | 4.26   | 4.37   |
| Dppa4         | 10.57  | 2.59   |

**Muscle**

|        |         |        |
|--------|---------|--------|
| Mylpf  | -111.79 | -96.85 |
| Tnnt1  | -90.57  | -11.47 |
| Myl1   | -81.06  | -3.33  |
| Actc1  | -71.28  | -45.60 |
| Tnnc2  | -69.35  | -26.55 |
| Atp2a1 | -27.53  | -12.33 |
| Tnnc1  | -24.75  | -37.74 |
| Igfbp5 | -23.59  | -8.54  |
| Ogn    | -18.16  | -11.81 |
| Tpm2   | -15.33  | -2.64  |
| Myog   | -13.14  | -35.92 |
| Acta1  | -10.34  | -9.06  |
| Tnnt3  | -8.93   | -11.32 |
| Myod1  | -5.96   | -8.40  |
| Pgam2  | -5.60   | -2.60  |
| Actn3  | -5.26   | -3.85  |
| Myom2  | -5.01   | -4.21  |
| Hey1   | -3.67   | -3.64  |
| Lrp4   | -3.59   | -6.53  |
| Sulf2  | -2.88   | -2.19  |
| Ncam1  | -2.82   | -17.57 |
| Nfatc4 | -2.56   | -3.11  |
| Pparg  | 3.23    | 2.52   |

**Signaling**

|        |       |       |
|--------|-------|-------|
| Itga11 | -6.00 | -4.26 |
| Cthrc1 | -3.35 | -5.73 |
| Ephb2  | -2.99 | -3.35 |



|        |       |       |
|--------|-------|-------|
| Gprc5b | -2.09 | -2.67 |
| Rcan2  | 2.91  | 5.25  |
| Apccd1 | 3.08  | 2.57  |

**Unannotated**

|               |       |        |
|---------------|-------|--------|
| Islr          | -8.28 | -9.23  |
| Lrrn1         | -6.42 | -8.08  |
| Rtn2          | -5.64 | -4.17  |
| Drp2          | -4.41 | -2.31  |
| Cd200         | -3.41 | -12.55 |
| Actg2         | -3.16 | -6.64  |
| Srl           | -3.06 | -3.97  |
| 1810014F10Rik | -2.76 | -4.16  |
| Cd82          | -2.63 | -2.16  |
| Tspan7        | 3.30  | 7.79   |
| Havcr2        | 4.58  | 5.95   |
| Cd69          | 4.73  | 2.58   |
| Ly6c1         | 5.58  | 5.81   |
| Ly6a          | 6.21  | 47.23  |

---
